# Supplementary material
Source: HighWire-hosted journal article supplement (https://bmjopen.bmj.com/content/10/3/e035004)
Supplement: inline-supplementary-material-3 [file inline-supplementary-material-3.pdf]

### Appendix 3 – Sensitivity analysis

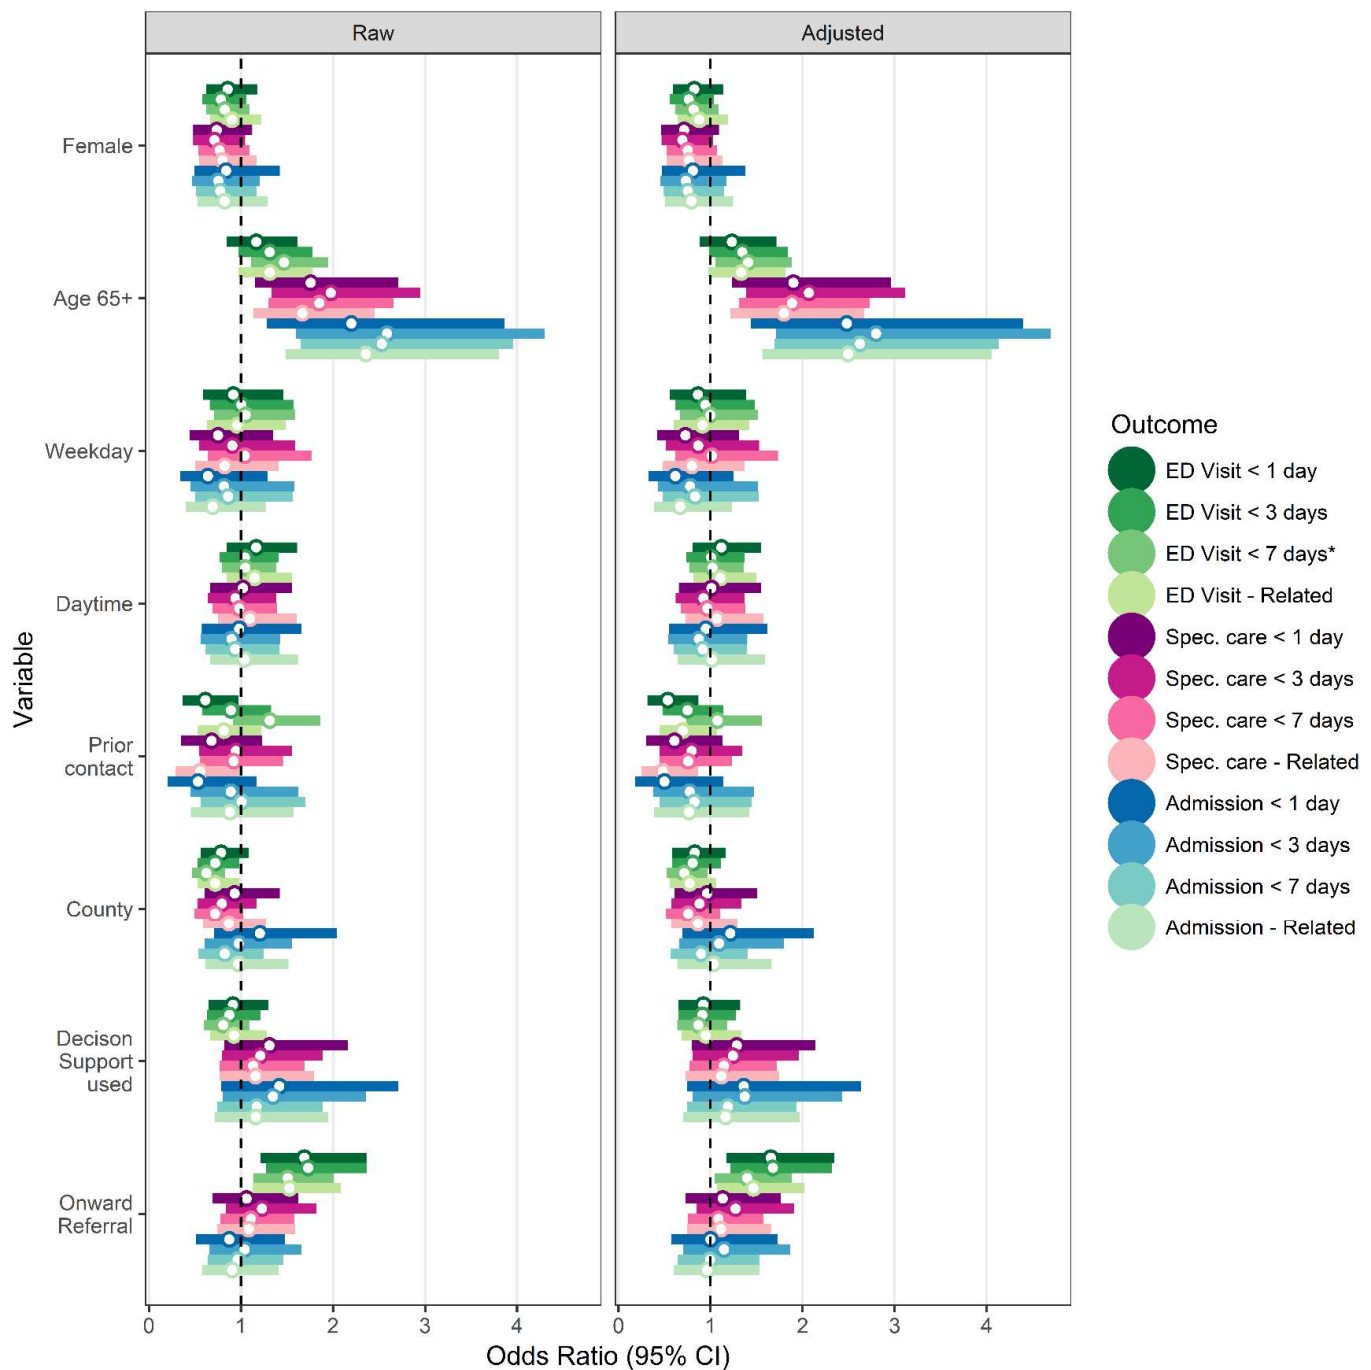

This figure presents point estimates and 95% confidence intervals for each of the investigated independent variables across a range of potential time intervals (1,3, and 7 days), and for only related contacts. Each set of criteria is investigated with regards to ED-visitation (As presented in the main analysis), for visits where specialist care was provided, and for visits resulting in admission to in-patient care.

\* This is the outcome presented in the main analysis.
